# Supplementary material for: Essential Oil from Zingiber ottensii Induces Human Cervical Cancer Cell Apoptosis and Inhibits MAPK and PI3K/AKT Signaling Cascades
Source: MDPI journal article supplement (doi:10.3390/plants10071419), 2021-07-12
Supplement: s1 [file s1]

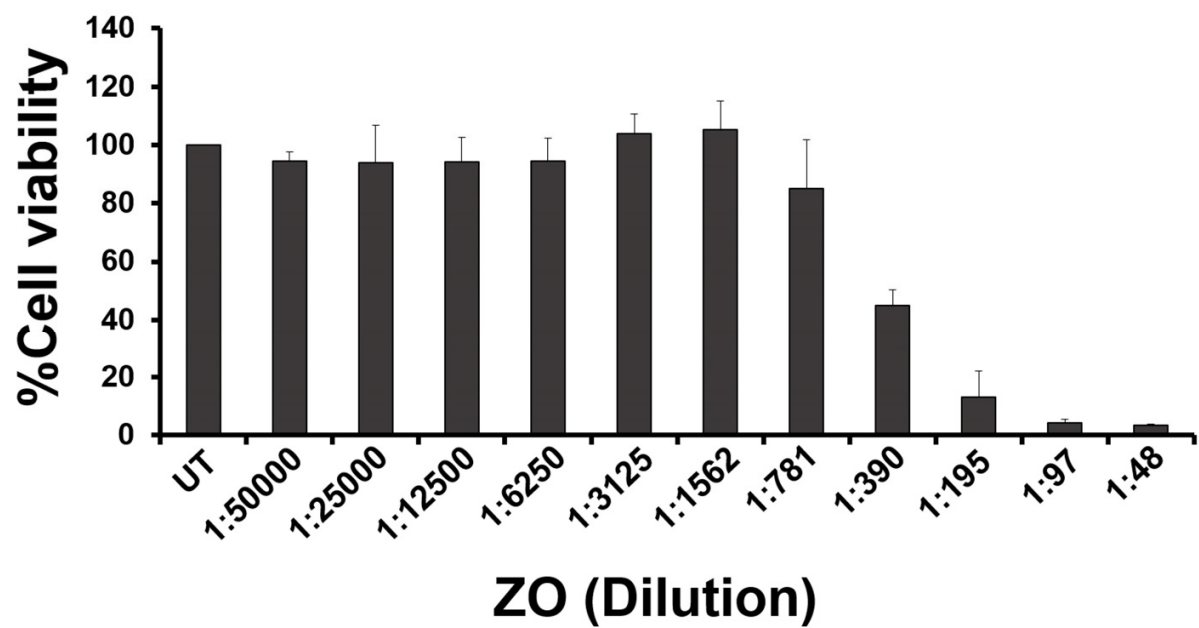

**Figure S1.** The effect of ZO essential oil on human primary fibroblast cell viability. The viability of human primary fibroblast cell viability upon treated with ZO essential oil for 24 h was tested by MTT assay. The Table 2. fold dilution before adding into the cells. The experiment was performed three times (triplicate each time).

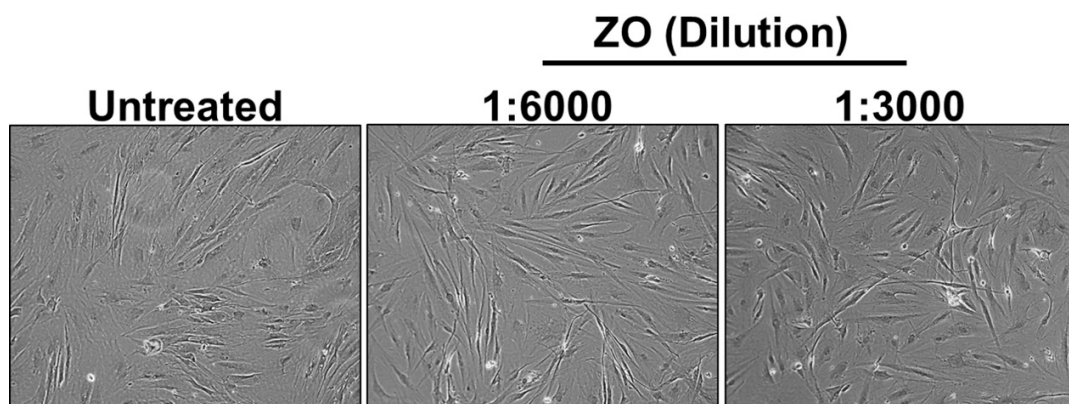

**Figure S2.** The effect of ZO essential oil at the dilution of 1:6000 and 1:3000 on the morphology of human primary fibroblast cell. The morphological changes of human primary fibroblast cell were visualized by a phase-contrast microscope after treated with ZO essential oil at indicated dilutions for 24 h.
